# Supplementary material
Source: PubMed Central journal article supplement (PMC5527580)
Supplement: AAC.00228-17_zac008176394s1.pdf [file AAC.00228-17_zac008176394s1.pdf]

**Appendix A****US Healthcare Facilities in the Premier Research Database with Accessible  
Microbiology Results****Characteristic, n (%)****(N=178)**

## Setting

Urban

142 (79.8)

Rural

36 (20.2)

## Facility

Teaching

62 (34.8)

Non-teaching

116 (65.2)

## Number of beds

0–99

30 (16.9)

100–199

40 (22.5)

200–299

39 (21.9)

300–399

27 (15.2)

400–499

14 (7.9)

500+

28 (15.7)

**Appendix B**

**cUTI**  
**At least one diagnosis from group A**  
**OR**  
**At least one diagnosis from group B**  
**AND**  
**At least one event (either diagnosis or procedure) from group C**

| <b>Group A (Diagnosis Codes)</b> |                                                                         |
|----------------------------------|-------------------------------------------------------------------------|
| <b>ICD-9-CM Diagnosis Code</b>   | <b>Description</b>                                                      |
| 598.0X                           | Urethral stricture due to infection                                     |
| 996.64                           | Infection and inflammatory reaction due to indwelling urinary catheter  |
| 590.1X                           | Acute pyelonephritis                                                    |
| 590.2X                           | Renal and perinephric abscess                                           |
| 590.3X                           | Pyeloureteritis cystica                                                 |
| 590.8X                           | Other pyelonephritis or pyonephrosis, not specified as acute or chronic |
| 590.9X                           | Infection of kidney, unspecified                                        |
| 590.XX                           | Infections of kidney                                                    |
| 590.0X                           | Chronic pyelonephritis without lesion of renal medullary necrosis       |
| 590.01                           | Chronic pyelonephritis with lesion of renal medullary necrosis          |
| 590.1X                           | Acute pyelonephritis NOS                                                |
| 590.2X                           | Renal/perirenal abscess                                                 |
| 590.3X                           | Pyeloureteritis cystica                                                 |
| 590.8X                           | Pyelonephritis NOS                                                      |
| 590.9X                           | Infection of kidney NOS                                                 |

NOS = not otherwise specified.

**Group B (Diagnosis Codes)**

| <b>ICD-9-CM Diagnosis Code</b> | <b>Description</b>                           |
|--------------------------------|----------------------------------------------|
| 598.8X                         | Other specified causes of urethral structure |
| 598.XX                         | Urethral stricture: infect NOS               |
| 599.0X                         | Urinary tract infection, site not specified  |
| 599.2X                         | Urethral diverticulum                        |
| 599.3X                         | Urethral caruncle                            |
| 599.4X                         | Urethral false passage                       |
| 599.5X                         | Prolapse urethral mucosa                     |
| 599.69                         | Urinary obstruction NEC                      |
| 595.XX                         | Acute cystitis                               |
| 595.3X                         | Trigonitis                                   |
| 595.4X                         | Cystitis in diseases classified elsewhere    |
| 595.8X                         | Other specified types of cystitis            |
| 595.9X                         | Cystitis, unspecified                        |
| 595.XX                         | Acute cystitis                               |
| 595.1X                         | Chronic interstitial cystitis                |
| 595.2X                         | Chronic cystitis NEC                         |
| 595.4X                         | Cystitis in diseases classified elsewhere    |
| 595.81                         | Cystitis cystica                             |
| 595.82                         | Irradiation cystitis                         |
| 595.89                         | Cystitis NEC                                 |
| 595.9X                         | Cystitis NOS                                 |
| 597.XX                         | Urethral abscess                             |
| 597.8X                         | Urethritis, unspecified                      |
| 597.8X                         | Urethritis NOS                               |
| 597.81                         | Urethral syndrome NOS                        |
| 597.89                         | Urethritis NEC                               |
| 599.1X                         | Urethral fistula                             |

NEC = "other"; NOS = not otherwise specified. **Group C (Diagnosis and Procedure Codes)**

| <b>Code Type</b>   | <b>Codes</b> | <b>Description</b>                                                                                                |
|--------------------|--------------|-------------------------------------------------------------------------------------------------------------------|
| ICD-9-CM procedure | 57.94        | Insertion of indwelling urinary catheter                                                                          |
| ICD-9-CM procedure | 57.95        | Replacement of indwelling urinary catheter                                                                        |
| ICD-9-CM procedure | 96.48        | Irrigation of indwelling urinary catheter                                                                         |
| CPT-4 procedure    | 51702        | Insertion of temporary indwelling bladder catheter, simple (eg, Foley)                                            |
| CPT-4 procedure    | 51703        | Insertion of temporary indwelling bladder catheter, complicated (eg, altered anatomy, fractured catheter/balloon) |
| ICD-9-CM diagnosis | V53.6X       | Urinary catheter                                                                                                  |
| ICD-9-CM diagnosis | V55.6X       | Attention to other artificial opening of urinary tract                                                            |
| ICD-9-CM diagnosis | 592.XX       | Nephrolithiasis or ureteric calculi                                                                               |
| ICD-9-CM diagnosis | 753.2X       | Obstructive defect of renal pelvis and ureter                                                                     |
| ICD-9-CM diagnosis | 599.6X       | Urinary obstruction                                                                                               |
| ICD-9-CM diagnosis | 600.XX       | Prostate hyperplasia                                                                                              |
| ICD-9-CM diagnosis | 596.XX       | Bladder neck obstruction                                                                                          |
| ICD-9-CM diagnosis | 591.XX       | Hydronephrosis                                                                                                    |
| ICD-9-CM diagnosis | 788.2X       | Retention of urine                                                                                                |
| ICD-9-CM diagnosis | 596.4X       | Atony of bladder                                                                                                  |
| ICD-9-CM diagnosis | 596.53       | Paralysis of bladder                                                                                              |
| ICD-9-CM diagnosis | 596.54       | Neurogenic bladder                                                                                                |
| ICD-9-CM diagnosis | 596.55       | Detrusor sphincter dyssynergia                                                                                    |

*ICD-9-CM = International Classification of Diseases, Ninth Edition, Clinical Modification; NOS = not otherwise specified.*

**cIAI**  
**At least one diagnosis from group A**  
**AND**  
**At least one procedure from group B**

| <b>Group A (Diagnosis Codes)</b> |                                                                   |                |
|----------------------------------|-------------------------------------------------------------------|----------------|
| <b>ICD-9-CM Diagnosis Code</b>   | <b>Description</b>                                                | <b>Comment</b> |
| 562.01                           | Diverticulitis of small intestine (without mention of hemorrhage) |                |
| 562.03                           | Diverticulitis of small intestine (with hemorrhage)               |                |
| 562.11                           | Diverticulitis of colon (without mention of hemorrhage)           |                |
| 562.13                           | Diverticulitis of colon (with hemorrhage)                         |                |
| 569.81                           | Fistula of intestine, excluding rectum and anus                   |                |
| 569.82                           | Ulceration of intestine                                           |                |
| 569.83                           | Perforation of intestine                                          |                |
| 531.1X                           | Gastric ulcer with perforation, acute                             |                |
| 531.2X                           | Gastric ulcer with hemorrhage and perforation, acute              |                |
| 531.5X                           | Gastric ulcer with perforation, chronic                           |                |
| 531.6X                           | Gastric ulcer with hemorrhage and perforation, chronic            |                |
| 532.1X                           | Duodenal ulcer with perforation, acute                            |                |
| 532.2X                           | Duodenal ulcer with hemorrhage and perforation, acute             |                |
| 532.5X                           | Duodenal ulcer with perforation, chronic                          |                |
| 532.6X                           | Duodenal ulcer with hemorrhage and perforation, chronic           |                |
| 533.1X                           | Peptic ulcer with perforation, acute                              |                |
| 533.2X                           | Peptic ulcer with hemorrhage and perforation, acute               |                |
| 533.5X                           | Peptic ulcer with perforation, chronic                            |                |
| 533.6X                           | Peptic ulcer with hemorrhage and perforation, chronic             |                |
| 534.1X                           | Gastrojejunal ulcer with perforation, acute                       |                |
| 534.2X                           | Gastrojejunal ulcer with hemorrhage and perforation, acute        |                |
| 534.5X                           | Gastrojejunal ulcer with perforation, chronic                     |                |
| 534.6X                           | Gastrojejunal ulcer with hemorrhage and perforation, chronic      |                |
| 540.0X                           | Acute appendicitis with generalized peritonitis                   |                |
| 540.1X                           | Acute appendicitis with peritoneal abscess                        |                |
| 541.XX                           | Appendicitis NOS                                                  |                |

|                                                    |                      |                                                                              |
|----------------------------------------------------|----------------------|------------------------------------------------------------------------------|
| 542.XX                                             | Other appendicitis   |                                                                              |
| 567.XX                                             | Peritonitis          |                                                                              |
| 569.5X                                             | Abscess of intestine |                                                                              |
| 572.XX                                             | Abscess of liver     |                                                                              |
| 575.4 plus 574.0, 574.3, 574.6,<br>574.8, or 575.0 | Acute cholecystitis  | Patients who meet this criterion will<br>need a minimum of 2 diagnosis codes |
| 576.1X                                             | Cholangitis          |                                                                              |

NOS = not otherwise specified.

**Group B (Procedure Codes)**

| <b>Code Type</b> | <b>Codes</b>                                                                                                                                                                                                                                                                                                                                                                                                                                                                                                                                                                                                                                                                                                                                                                                                                                                                                                                                                                                                                                                                                                                                                                                                                                                                                                                                                                                                                                                                                                                                                                                                                                                                                                                                                                                                                                                                                                                                                                                                                                                                                                                                                                                                                                                                                                                                                                                                                                                                                                                                    | <b>Description</b>                                |
|------------------|-------------------------------------------------------------------------------------------------------------------------------------------------------------------------------------------------------------------------------------------------------------------------------------------------------------------------------------------------------------------------------------------------------------------------------------------------------------------------------------------------------------------------------------------------------------------------------------------------------------------------------------------------------------------------------------------------------------------------------------------------------------------------------------------------------------------------------------------------------------------------------------------------------------------------------------------------------------------------------------------------------------------------------------------------------------------------------------------------------------------------------------------------------------------------------------------------------------------------------------------------------------------------------------------------------------------------------------------------------------------------------------------------------------------------------------------------------------------------------------------------------------------------------------------------------------------------------------------------------------------------------------------------------------------------------------------------------------------------------------------------------------------------------------------------------------------------------------------------------------------------------------------------------------------------------------------------------------------------------------------------------------------------------------------------------------------------------------------------------------------------------------------------------------------------------------------------------------------------------------------------------------------------------------------------------------------------------------------------------------------------------------------------------------------------------------------------------------------------------------------------------------------------------------------------|---------------------------------------------------|
| ICD-9-CM         | 43.5X-43.9X, 44.40-44.42, 44.61, 45.6X-46.13, 46.20-46.23, 46.7X, 46.80-46.82, 46.91-46.94, 46.99, 47.XX, 50.0X, 50.12-50.69, 51.02-51.04, 51.13, 51.2X, 51.3X, 51.4X-51.5X, 51.61-51.63, 51.69, 51.7X, 51.81-51.83, 51.89, 51.91-51.95, 51.99, 52.01, 52.09, 52.12, 52.22, 52.3X-52.83, 52.92, 52.95, 52.96, 52.99, 54.1X, 54.21, 54.4X, 54.5X, and/or 54.92-54.95                                                                                                                                                                                                                                                                                                                                                                                                                                                                                                                                                                                                                                                                                                                                                                                                                                                                                                                                                                                                                                                                                                                                                                                                                                                                                                                                                                                                                                                                                                                                                                                                                                                                                                                                                                                                                                                                                                                                                                                                                                                                                                                                                                             | Laparotomy, laparoscopy, or percutaneous drainage |
| CPT-4            | 43117, 43118, 43121, 43122, 43631, 43632, 43633, 43634, 43775, 43845, 43620, 43621, 43622, 43840, 43500, 43501, 43502, 43840, 44602, 44603, 43840, 44110, 44111, 44120, 44121, 44125, 43496, 44120, 44121, 44125, 44126, 44127, 44128, 44132, 44133, 44202, 44203, 44660, 44661, 44132, 44133, 44155, 44156, 44212, 44143, 44144, 44160, 44204, 44205, 44206, 44141, 44144, 44155, 44156, 44160, 44204, 44205, 44206, 44212, 44146, 44147, 44207, 44208, 45395, 45397, 45550, 44139, 44140, 44144, 44147, 44213, 44660, 44661, 44210, 44211, 44212, 44137, 44150, 44151, 44155, 44156, 44157, 44158, 44620, 44625, 44626, 43845, 44160, 44144, 44145, 44146, 44799, 45113, 44211, 44141, 44188, 44320, 44322, 44604, 44605, 45820, 45825, 44300, 44322, 57307, 45562, 45563, 45800, 45805, 45126, 51597, 58240, 44120, 4412, 44125, 44150, 44155, 44156, 44187, 44310, 44144, 44187, 44310, 44151, 44316, 44799, 44210, 44211, 44212, 45136, 44602, 44603, 35870, 44640, 44650, 44602, 44602, 44615, 35780, 44640, 44650, 44604, 44605, 35870, 44650, 44370, 44379, 44383, 44397, 44602, 44603, 44604, 44605, 44615, 45327, 45345, 45387, 44799, 44050, 44055, 44799, 44137, 44139, 44213, 44700, 44701, 45136, 44970, 44950, 44955, 44960, 44900, 49406, 50845, 44650, 44799, 44979, 47010, 47001, 47100, 47560, 47561, 47700, 49220, 37200, 47561, 47300, 47120, 47122, 47125, 47130, 47133, 47140, 47141, 47142, 47380, 47381, 47382, 47399, 47120, 47122, 47125, 47130, 47140, 47141, 47142, 47133, 47140, 47141, 47142, 47350, 47360, 47361, 47362, 47350, 47360, 47361, 47362, 47490, 47480, 48000, 48001, 47480, 47560, 47561, 47600, 47605, 47600, 47605, 47610, 47612, 47620, 47562, 47563, 47564, 47999, 47570, 47610, 47612, 47620, 47701, 47360, 47420, 47425, 47564, 47610, 47612, 47620, 47700, 47510, 47511, 43273, 47400, 47999, 48148, 47715, 47711, 47712, 47999, 47900, 47460, 47420, 47425, 47460, 47610, 47612, 47620, 47999, 47999, 43275, 47510, 47511, 49405, 48020, 48510, 48100, 48105, 48120, 48500, 43240, 48999, 48140, 48145, 48146, 48155, 48160, 48550, 48150, 48152, 48153, 48154, 48554, 43273, 48999, 48545, 48547, 48140, 48145, 48150, 48152, 48153, 48154, 48000, 48001, 48556, 49000, 49220, 58960, 49002, 58960, 35840, 47015, 49020, 49040, 49060, 49412, 49320, 44820, 49203, 49204, 49205, 49215, 49255, 58662, 58943, 58950, 58951, 58952, 58953, 58954, 58956, 58957, 58958, 60545, 44180, 44005, 49402, 49324, 49325, 49418, 49419, 49421, 49999, 49425, 49426, 44050, 44055, 49412, 49418, 49419 | Laparotomy, laparoscopy, or percutaneous drainage |

## Hospital-associated pneumonia, including ventilator-associated pneumonia (VAP)

### Algorithm 1

- 1) A primary OR secondary discharge diagnosis of VAP (**997.31**)
- 2)  $\geq 1$  positive cultures for Gram-negative bacteria of interest drawn from a site consistent with pneumonia (the date of the earliest such culture will be deemed the index date)
- 3) Index date  $\geq 3$  days following admission

AND

- 4) Receipt of antibiotics on the index date or within the 3-day period thereafter

### Algorithm 2

- 1) Any discharge diagnosis (ie, principal or secondary) of pneumonia (excluding VAP) (**481.xx, 482.xx, 483.xx, 484.xx, 486.xx, 482.0, 482.1, 482.2, 485.xx**)
- 2)  $\geq 1$  positive cultures for Gram-negative bacteria of interest drawn from a site consistent with pneumonia (the date of the earliest such culture will be deemed the index date)
- 3) Index date  $\geq 3$  days following admission

AND

- 4) Receipt of antibiotics on the index date or within the 3-day period thereafter

### Algorithm 3

- 1) Any discharge diagnosis (ie, principal or secondary) of pneumonia (excluding VAP)
- 2)  $\geq 1$  positive cultures for Gram-negative bacteria of interest drawn from a site consistent with pneumonia (the date of the earliest such culture will be deemed the “index date”)  $< 3$  days following admission
- 3) Receipt of antibiotics on the index date or within the 3-day period thereafter

AND

- 4) Evidence that the source of pneumonia was nosocomial (as opposed to community-acquired or healthcare associated)



## BSI

| ICD-9-CM Diagnosis Code | Description                                                                 |
|-------------------------|-----------------------------------------------------------------------------|
| 790.7                   | Bacteremia                                                                  |
| 038.0                   | Streptococcal septicemia                                                    |
| 038.10                  | Staphylococcal septicemia, unspecified                                      |
| 038.11                  | Methicillin-susceptible <i>Staphylococcus aureus</i> septicemia             |
| 038.12                  | Methicillin-resistant <i>S aureus</i> septicemia                            |
| 038.19                  | Other staphylococcal septicemia                                             |
| 038.2                   | Pneumococcal septicemia                                                     |
| 038.3                   | Septicemia due to anaerobes                                                 |
| 038.40                  | Septicemia due to Gram-negative organism, unspecified                       |
| 038.41                  | Septicemia due to <i>Haemophilus influenzae</i> ( <i>H influenzae</i> )     |
| 038.42                  | Septicemia due to <i>E coli</i>                                             |
| 038.43                  | Septicemia due to <i>Pseudomonas</i> spp                                    |
| 038.44                  | Septicemia due to <i>Serratia</i> spp                                       |
| 038.49                  | Other septicemia due to Gram-negative organisms                             |
| 038.8                   | Other specified septicemias                                                 |
| 038.9                   | Unspecified septicemia                                                      |
| 421.0                   | Acute and subacute bacterial endocarditis                                   |
| 421.1                   | Acute and subacute infective endocarditis in diseases, classified elsewhere |
| 421.9                   | Acute endocarditis, unspecified                                             |
| 424.90                  | Endocarditis valve, unspecified cause                                       |
| 771.81                  | Septicemia [sepsis] of newborn                                              |
| 995.91                  | Sepsis                                                                      |

**Appendix C. Designated Culture Sites for Infection Types of Interest**

| <b>Culture Site</b>                  | <b>cUTI</b> | <b>cIAI</b> | <b>HAP</b> | <b>VAP</b> | <b>Bacteremia</b> |
|--------------------------------------|-------------|-------------|------------|------------|-------------------|
| Urine culture                        | X           |             |            |            |                   |
| Gastric culture                      |             | X           |            |            |                   |
| Wound culture                        |             | X           |            |            |                   |
| Fluid culture                        |             | X           |            |            |                   |
| Body fluid culture                   |             | X           |            |            |                   |
| Wound culture deep                   |             | X           |            |            |                   |
| Aerobic culture                      |             | X           |            |            |                   |
| Tissue culture                       |             | X           |            |            |                   |
| Drainage culture                     |             | X           |            |            |                   |
| Wound culture aerobic/anaerobic      |             | X           |            |            |                   |
| Wound culture aerobic                |             | X           |            |            |                   |
| Wound culture superficial            |             | X           |            |            |                   |
| Abscess culture                      |             | X           |            |            |                   |
| Blood culture                        |             |             |            |            | X                 |
| Quantitative blood culture           |             |             |            |            | X                 |
| Respiratory culture                  |             |             | X          | X          |                   |
| Quantitative respiratory culture     |             |             | X          | X          |                   |
| Respiratory culture, cystic fibrosis |             |             | X          | X          |                   |
| Sputum culture                       |             |             | X          | X          |                   |
| Bronchial culture                    |             |             | X          | X          |                   |
| Bronchial/BAL lavage                 |             |             | X          | X          |                   |

BAL = bronchoalveolar; cIAI = complicated intra-abdominal infection; cUTI = complicated urinary tract infection; HAP = hospital-associated pneumonia; VAP = ventilator-associated pneumonia
